# Supplementary material
Source: HighWire-hosted journal article supplement (https://erj.ersjournals.com/content/58/6/2101796)
Supplement: inline-supplementary-material-1 [file inline-supplementary-material-1.pdf]

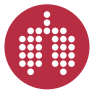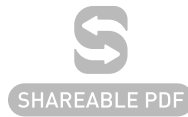

## Reply to: Room for methodological improvement in gait speed study for COPD patients

Jessica A. Walsh<sup>1,2,8</sup>, Ruth E. Barker<sup>1,3,4,8</sup>, Samantha S.C. Kon<sup>1,4,8</sup>, Sarah E. Jones<sup>1</sup>, Winston Banya<sup>5</sup>, Claire M. Nolan<sup>1,3</sup>, Suhani Patel<sup>1,3</sup>, Oliver Polgar<sup>1</sup>, Brigitte M. Haselden<sup>4</sup>, Michael I. Polkey<sup>3,6</sup>, Paul Cullinan<sup>3,7</sup> and William D-C. Man<sup>1,2,3,6</sup>

<sup>1</sup>Harefield Respiratory Research Group, Royal Brompton & Harefield Hospitals, Guy's and St. Thomas' NHS Foundation Trust, London, UK. <sup>2</sup>Harefield Pulmonary Rehabilitation Unit, Royal Brompton & Harefield Hospitals, Guy's and St. Thomas' NHS Foundation Trust, London, UK. <sup>3</sup>National Heart & Lung Institute, Imperial College, London, UK. <sup>4</sup>Dept of Respiratory Medicine, The Hillingdon Hospital NHS Trust, London, UK. <sup>5</sup>Dept of Medical Statistics, Research & Development, Royal Brompton & Harefield Hospitals, Guy's and St. Thomas' NHS Foundation Trust, London, UK. <sup>6</sup>Dept of Respiratory Medicine, Royal Brompton & Harefield Hospitals, Guy's and St. Thomas' NHS Foundation Trust, London, UK. <sup>7</sup>Dept of Occupational and Environmental Medicine, Imperial College, London, UK. <sup>8</sup>Contributed equally.

Corresponding author: Ruth E. Barker ([r.barker2@rbht.nhs.uk](mailto:r.barker2@rbht.nhs.uk))

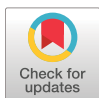

Shareable abstract (@ERSpublications)

**This study shows 4-m gait speed adds prognostic information for patients following an acute exacerbation of COPD; it should be considered in the development of future risk prediction models with appropriate validation and methodology** <https://bit.ly/3jTSdED>

**Cite this article as:** Walsh JA, Barker RE, Kon SSC, *et al.* Reply to: Room for methodological improvement in gait speed study for COPD patients. *Eur Respir J* 2021; 58: 2101796 [DOI: 10.1183/13993003.01796-2021].

This single-page version can be shared freely online.

Copyright ©The authors 2021.  
For reproduction rights and  
permissions contact  
[permissions@ersnet.org](mailto:permissions@ersnet.org)

Received: 30 June 2021  
Accepted: 4 July 2021

*Reply to N. Kuroda and co-workers:*

We thank N. Kuroda and co-workers for their interest our work [1], and for sharing their methodological expertise. We agree with their comments and were transparent about the limitations of the study in our discussion. The comments around internal validation and model performance comparison are particularly pertinent to the development of risk prediction models.
